# Supplementary material
Source: publisher figshare collection journal article supplement (https://asha.figshare.com/ndownloader/files/34076417)
Supplement: Supplementary file 1 [file 34076417]

## Sheet: ReadMe
Supplemental material, Storkel, "Minimal, Maximal, or Multiple: Which Contrastive Intervention Approach to Use With Children With Speech Sound Disorders?" LSHSS, https://doi.org/10.1044/2021_LSHSS-21-00105
Supplemental Material S7. Completed sound selection spreadsheet for Isabella (5 years; 7 months, girl, severe speech sound disorder), not recommending contrastive approach.
This case accompanies Storkel's article Minimal, maximal, or multiple: Which contrastive intervention approach to use with different children with speech sound disorders? Published in Language, Speech, and Hearing Services in Schools.
This is a hypothetical case. Hypothetical cases are based on real children. Specifically, children's parents gave consent for data to be deidentified and used for teaching and research purposes. Accuracy and error patterns generally are taken from real cases but then additional information was created based on the author's personal experience to enrich the case. Likewise, children's phonological …
Ava is age 5;7 and was identified as female at birth.
Her standard score on the Arizona-4 Articulation Test was 66, corresponding to a percentile rank of 1, corresponding to a severity rating of Severe
Her standard score on the Arizona-4 Phonological Test was 55, corresponding to a percentile rank of 0.1, corresponding to a severity rating of Severe
Additional testing showed poor language (i.e., Standard Score of 44, Percentile Rank of 0.1 on the Core Language Score on the Clinical Evaluation of Language Fundamentals-4) and poor phonological awareness (i.e., Standard Score of 65, Percentile Rank of 2 on the Comprehensive Test of Phonological Processing-2)
The teacher reports that Ava generally is cooperative and participates in activities, including talking.
Phonological Summary (See Child_data tab for details):
The deep probe of mid- and late-8 sounds shows low accuracy for /θ ð ʃ l r/ . Her primary cluster error is gliding of liquids in l- and r-clusters, which are 0% accurate.
Contrastive Approaches: Thoughts for Ava
Given her severe speech sound disorder and that her errors are phonological in nature, the multiple or maximal opposition approaches may be appropriate. We want to look at the multiple oppositions worksheet to determine if there is evidence of a global phoneme collapse.
There isn't evidence of any global phoneme collapses. Generally, substitute sounds are only produced for one or two targets. Multiple oppositions is not an appropriate option.
Next, we consider maximal opposition. There are only two options for maximal opposition: θ-r, ʃ-l. However, singletons don't seem to be Ava's biggest error pattern. Many more targets are impacted by her cluster error pattern and it is likely that this pattern has a greater impact on her intelligibility. Importantly, intervention of clusters can spark change in singletons. See Storkel (2018) https…
We could consider targeting clusters using conventional minimal pairs. However, gliding of the liquid often creates sequences that don't occur in English, which means that conventional minimal pair would not be possible. For example, [bw] for /bl/ or /br/ is not a legal cluster in English. There are no target words for /bw/ in English. The only w-clusters in English are tw, kw, sw so conventional…
Note that the suggested target clusters have a 90% age-of-acquisition based on the Smit and colleagues norms that is beyond (i.e., later than) Ava's age of 5;7. Some SLPs may be hesitant to select targets with a 90% age-of-acquisition that is older than the child's age. However, this misses the fact that many children Ava's age are producing at least some of these clusters accurately. If we sligh…

## Sheet: Child_data
Accuracy Analysis		Onset#	Onset%	Coda#	Coda%	Total%	Onset Productions					Coda Productions					Majority Error Initial	Majority Error Final	Majority Subst Initial	Majority Subst Final
	k	5	1	5	1	1	k	k	k	k	k	k	k	k	k	k	Accurate	Accurate
	g	5	1	5	1	1	g	g	g	g	g	g	g	g	g	g	Accurate	Accurate
	f	5	1	5	1	1	f	f	f	f	f	f	f	f	f	f	Accurate	Accurate
	v	2	0.4	4	0.8	0.6	b	b	v	v	b	v	b	v	v	v	Accurate	Accurate
	T	1	0.2	0	0	0.1	s	f	T	s	J	f	f	f	f	f	Substitution	Substitution	variable	f
	D	0	0	0	0	0	d	d	d	d	d	d	d	d	N/A	N/A	Substitution	Substitution	d	d
	s	5	1	5	1	1	s	s	s	s	s	s	s	s	s	s	Accurate	Accurate
	z	5	1	5	1	1	z	z	z	z	z	z	z	z	z	z	Accurate	Accurate
	S	1	0.2	0	0	0.1	s	S	s	s	s	s	s	C	s	s	Substitution	Substitution	s	s
	C	5	1	5	1	1	C	C	C	C	C	C	C	C	C	C	Accurate	Accurate
	J	5	1	5	1	1	J	J	J	J	J	J	J	J	J	J	Accurate	Accurate
	G	N/A	N/A	4	0.8	0.8	N/A	N/A	N/A	N/A	N/A	G	G	n	G	G	Accurate	Accurate
	l	0	0	0	0	0	w	w	w	w	w	del	del	del	del	del	Substitution	Deletion	w	del
	r	0	0	0	0	0	w	w	w	w	w	del	del	del	del	del	Substitution	Deletion	w	del
	ALL	39	0.58209	43	0.632353	0.607407	67 opportunities					68 opportunities
Snd		#	%	Accuracy Analysis by Sound	Productions																		Majority Error
w-cluster		6	1	kw, tw, sw	kw	kw	tw	tw	sw	sw													Other
l-cluster		0	0	kl, pl, bl, gl, fl, sl	kw	kw	pw	pw	bw	bw	gw	gw	fw	fw	sw	sw							Simplification
r-cluster		0	0	kr, pr, tr, br, dr, gr, fr, Sr, Tr	kw	kw	pw	pw	tw	tw	bw	bw	dw	dw	gw	gw	fw	fw	sw	sw	fw	fw	Simplification
s-cluster		12	0.857143	sw, sl, sm, sn, sk, sp, st	sw	sw	sw	sw	sm	sm	sn	sn	sk	sk	sp	sp	st	st					Other
3s		2	0.2	skw, spl, skr, spr, str	skw	skw	spw	spw	skw	skw	spw	spw	stw	stw									Simplification

## Sheet: Minimal
Calculations (Ignore)			Possible Targets in Initial Position	Substitute for Initial Position Pair	Possible Targets in Final Position	Substitute for Final Position Pair	Calculations (Ignore)			Are the substitutes English sounds? (If no, eliminate)	Are the substitutes consistent? (If no, eliminate)	List relevant child/family factors for or against this option	List relevant SLP/ expertise factors for or against this option	Is the child stimulable for the target? (intervention planning)	Can the child accurately perceive the target:substitute? (intervention planning)
0	0	0	0	0	0	0	0	0	0
0	0	0	0	0	0	0	0	0	0
0	0	0	0	0	0	0	0	0	0
0	0	0	0	0	0	0	0	0	0
1	1	2	T	variable	T	f	1	1	2	yes	no for initial
1	1	2	D	d	D	d	1	1	2	yes	yes
0	0	0	0	0	0	0	0	0	0
0	0	0	0	0	0	0	0	0	0
1	1	2	S	s	S	s	1	1	2	yes	yes
0	0	0	0	0	0	0	0	0
0	0	0	0	0	0	0	0	0	0
0	0	0	0	0	0	0	0	0	0
1	1	2	l	w	l	del	1	1	2	yes	yes
1	1	2	r	w	r	del	1	1	2	yes	yes
						Add Notes from Child Data				Are the substitutes English sounds? (If no, eliminate)	Are the substitutes consistent? (If no, eliminate)	List relevant child/family factors for or against this option	List relevant SLP/ expertise factors for or against this option	Is the child stimulable for the target? (intervention planning)	Can the child accurately perceive the target:substitute? (intervention planning)
0	0	0	0	0	0
1	1	2	l-cluster	kl, pl, bl, gl, fl, sl	Simplification		sw-sl, kw-kl			many errors are non-English	generally consistent
1	1	2	r-cluster	kr, pr, tr, br, dr, gr, fr, Sr, Tr	Simplification		kw-kr, tw-tr, sw-Sr			many errors are non-English	generally consistent
0	0	0	0	0	0
1	1	2	3s	skw, spl, skr, spr, str	Simplification		skw-skr			many errors are non-English	generally consistent

## Sheet: Maximal
Initial	l	r	List relevant child/family factors for or against options in this row (initial)	List relevant SLP/ expertise factors for or against options in this row (initial)	Final	ŋ	l	r	List relevant child/family factors for or against options in this row (final)	List relevant SLP/ expertise factors for or against options in this row (final)
k	0	0			k		0	0
g	0	0			g		0	0
f	0	0			f	0	0	0
v	0	0			v	0	0	0
θ		yes			θ	0		yes
ð					ð
s	0	0			s	0	0	0
z		0			z	0		0
ʃ	yes				ʃ	0	yes
ʧ	0	0			ʧ	0	0	0
ʤ	0				ʤ	0	0
Calculations (Ignore)
	Initial	Final	Initial	Final	Initial	Final
k	0	0	-1	-1	-1	-1
g	0	0	-1	-1	-1	-1
f	0	0	-1	-1	-1	-1
v	0	0	-1	-1	-1	-1
θ	1	1	0	0	1	1
ð	1	1	0	0	1	1
s	0	0	-1	-1	-1	-1
z	0	0	-1	-1	-1	-1
ʃ	1	1	0	0	1	1
ʧ	0	0	-1	-1	-1	-1
ʤ	0	0	-1	-1	-1	-1
ŋ	0	0	-1	-1	-1	-1
l	1	1	0	0	1	1
r	1	1	0	0	1	1

## Sheet: Multiple
Possible Targets in Initial Position	Substitute for Initial Position Pair	Possible Targets in Final Position	Substitute for Final Position Pair		Step 2a: Enter substitutes with high number of targets here	Step 2b: list targets for each substitute here																					List relevant child/family factors for or against this option	List relevant SLP/ expertise factors for or against this option
0	0	0	0	initial	Not really a global phoneme collapse
0	0	0	0	initial
0	0	0	0	initial
0	0	0	0	initial
T	variable	T	f	initial
D	d	D	d
0	0	0	0	final
0	0	0	0	final
S	s	S	s	final
0	0	0	0	final
0	0	0	0	final
0	0	0	0	Step 3: Selection of targets to pair with substitutes. Make notes about child/family and clinical/expertise factors in the columns to the right. In the space above, shade targets in grey if you don't intend to use them. Shade them in yellow if you want to consider selecting them. Change shading to green for final selection. Remember that you want to select a range of targets affected by the colla…
l	w	l	del
r	w	r	del
					Targets	Cluster productions -- All productions copied via formula
0		0			kw, tw, sw	kw	kw	tw	tw	sw	sw
l-cluster		Simplification			kl, pl, bl, gl, fl, sl	kw	kw	pw	pw	bw	bw	gw	gw	fw	fw	sw	sw
r-cluster		Simplification			kr, pr, tr, br, dr, gr, fr, Sr, Tr	kw	kw	pw	pw	tw	tw	bw	bw	dw	dw	gw	gw	fw	fw	sw	sw	fw	fw
0		0			sw, sl, sm, sn, sk, sp, st	sw	sw	sw	sw	sm	sm	sn	sn	sk	sk	sp	sp	st	st
3s		Simplification			skw, spl, skr, spr, str	skw	skw	spw	spw	skw	skw	spw	spw	stw	stw
Step 1
Enter initial position substitute here (one per row)	Formula calculates # of targets with this substitute in initial position (singletons & clusters)	Enter final position substitute here (one per row)	Formula calculates # of targets with this substitute in final position (singletons only)
d	1		9
sw	10		9		sw, sl, Sr -- number is high because cluster production is shown for all productions
tw	4		9		tw, tr -- number is high because cluster production is shown for all productions
kw	6		9		kw, kr, kl -- number is high because cluster production is shown for all productions
w	2		9
	9		9
	9		9
	9		9
	9		9
	9		9
	9		9
	9		9
	9		9
	9		9
	9		9
	9		9
	9		9
	9		9
	9		9
